# Supplementary material
Source: PubMed Central journal article supplement (PMC3868952)
Supplement: NIHMS507718-supplement-1.pdf [file NIHMS507718-supplement-1.pdf]

## **GRIN2A mutations cause epilepsy-aphasia spectrum disorders**

Gemma L Carvill<sup>1</sup>, Brigid M Regan<sup>2</sup>, Simone C Yendle<sup>2</sup>, Brian J O’Roak<sup>3</sup>, Natalia Lozovaya<sup>4,5,6,7</sup>, Nadine Bruneau<sup>4,5,6,8</sup>, Nail Burnashev<sup>4,5,6,8</sup>, Adiba Khan<sup>1</sup>, Joseph Cook<sup>1</sup>, Eileen Geraghty<sup>1</sup>, Lynette G Sadleir<sup>9</sup>, Samantha J Turner<sup>2,10</sup>, Meng-Han Tsai<sup>2</sup>, Richard Webster<sup>11</sup>, Robert Ouvrier<sup>11</sup>, John A Damiano<sup>2</sup>, Samuel F Berkovic<sup>2</sup>, Jay Shendure<sup>3</sup>, Michael S Hildebrand<sup>2</sup>, Pierre Szepetowski<sup>4,5,6,8</sup>, Ingrid E Scheffer<sup>2,10,12\*</sup>, Heather C Mefford<sup>1\*</sup>

1. Division of Genetic Medicine, Department of Pediatrics, University of Washington, Seattle, Washington, 98195, USA
2. Epilepsy Research Centre, Department of Medicine, University of Melbourne, Austin Health, Australia
3. Department of Genome Sciences, University of Washington, Seattle, Washington, 98195, USA
4. Mediterranean Institute of Neurobiology (INMED), Marseille, France
5. INSERM UMR\_S901, Marseille, France
6. Aix-Marseille University, Marseille, France
7. INSERM UMR\_S663, Paris Descartes University, Paris, France
8. French EPILAND network on Epilepsy, Language and Development
9. Department of Pediatrics, School of Medicine and Health Sciences, University of Otago, Wellington, New Zealand
10. Department of Pediatrics, University of Melbourne, Royal Children’s Hospital, Australia
11. T.Y. Nelson Department of Neurology and Neurosurgery, The Children’s Hospital at Westmead, Sydney, New South Wales, Australia
12. Florey Institute, Melbourne, Australia

\*These authors contributed equally to this work.

Correspondence to

Dr. Heather Mefford: [hmefford@u.washington.edu](mailto:hmefford@u.washington.edu) and  
Prof Ingrid Scheffer: [scheffer@unimelb.edu.au](mailto:scheffer@unimelb.edu.au)

## **Table of contents**

**Supplementary Figure 1** Genotyping in two EAS families illustrating a common haplotype for the c.1005-1C>T splice-site mutation.

**Supplementary Table 1** *In silico* prediction of the functional consequences of the c1005-1C>T variation on pre-mRNA splicing

**Supplementary Figure 2** RNA transcript analysis of a rare exonic SNV in three probands carrying the c1005-1C>T mutation.

**Supplementary Table 2** Electro-clinical phenotypes of family members with *GRIN2A* mutations

**Supplementary Table 3** PCR primer pairs for cDNA amplification of rs6173382

**Supplementary Note** Human subject recruitment and diagnosis

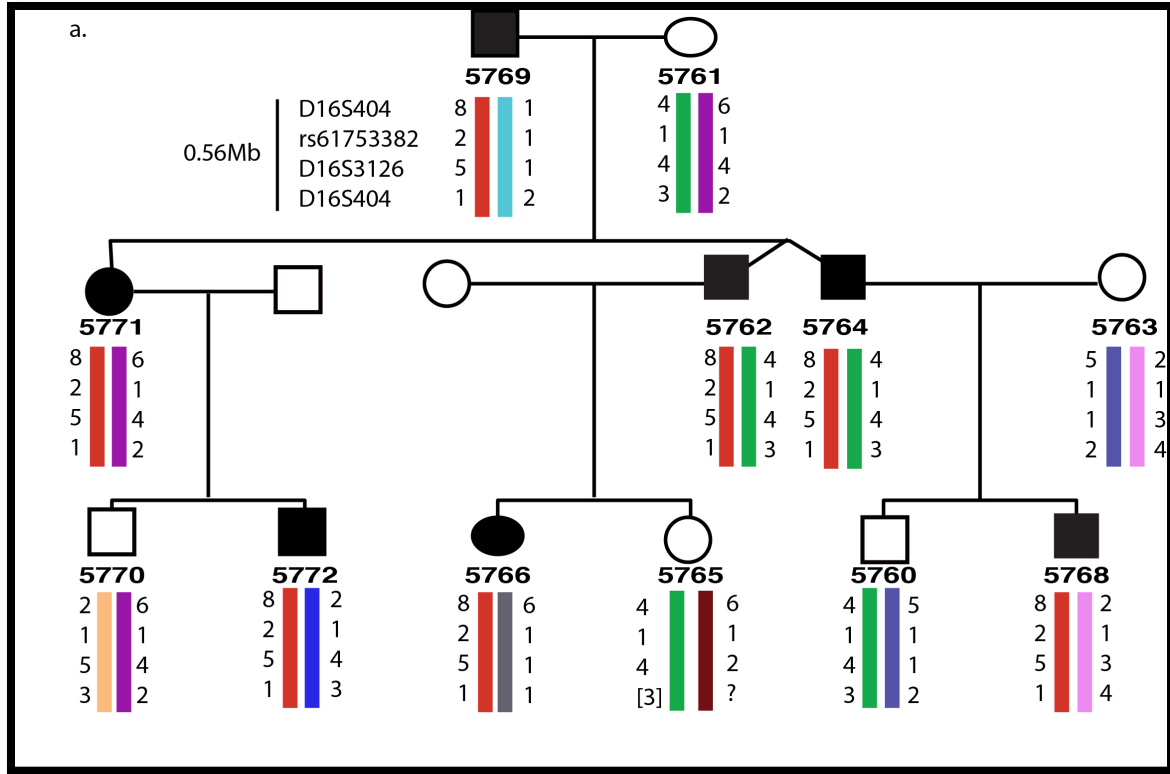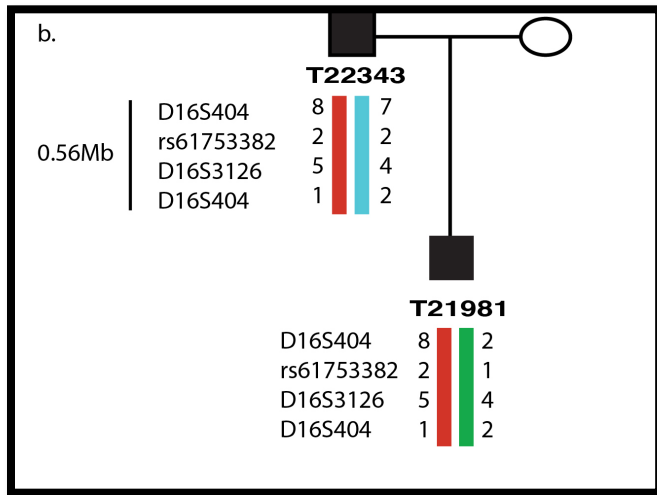

**c. Size of microsatellite markers**

| Allele number | D16S404 | D16S3126 | D16S407 |
|---------------|---------|----------|---------|
| 1             | 146     | 204      | 344     |
| 2             | 156     | 240      | 348     |
| 3             | 158     | 242      | 350     |
| 4             | 160     | 246      | 352     |
| 5             | 162     | 248      |         |
| 6             | 164     | 250      |         |
| 7             | 166     |          |         |
| 8             | 174     |          |         |

rs61753382 alleles: G (1), A (2)  
MAF = 0.015

**Supplementary Figure 1:** Genotyping in two EAS families reveals a common haplotype for the c.1005-1C>T splice-site mutation. Genotyping of three microsatellite markers and a rare exonic SNV (rs61753382) spanning a 0.56Mb region flanking *GRIN2A* was performed in both families carrying the c.1005-1C>T mutation, missing genotypes are designated with '?' and inferred genotypes with the allele in [], allele sizes are given for each marker in c. Haplotype phasing in a) revealed the presence of a common haplotype (indicated in red) in all affected individuals in family A, this haplotype was identical to that in affected members of family C (b), consistent with a common founder effect for these two Australian families of European descent.

**Supplementary Table 1:** *In silico* prediction of the functional consequences of the c1005-1C>T variation on pre-mRNA splicing

|                      | <b>Wildtype</b> | <b>c.1005-1C&gt;T</b> |
|----------------------|-----------------|-----------------------|
| Splice site sequence | cccGTAAGA       | cccATAAGA             |
| MAXENT               | 5.66            | -2.52                 |
| MDD                  | 10.78           | 2.60                  |
| MM                   | 6.55            | -1.63                 |
| WMM                  | 6.53            | -1.65                 |

MAXENT, Maximum Entropy Model; MDD, Maximum Dependence Decomposition model; MM, First-order Markov Model; WMM, Weight Matrix Model

The c.1005-1C>T variant disrupts the donor splice-site of exon four of the *GRIN2A* splice-site. *In silico* analysis using MaxEntScan predicted that the c.1005-1C>T variant abolishes the 5' splice recognition site, under all four splice-site prediction models. These models have been shown to accurately predict the functional effect of intronic variants on pre-mRNA splicing<sup>1</sup>. We hypothesized that this mutation resulted in the skipping of exon four in pre-mRNA splicing, resulting in the removal of 593 nucleotides from the transcript and a frameshift mutation, Phe139Ilefs\*15 (predicted).

[http://genes.mit.edu/burgelab/maxent/Xmaxentscan\\_scoreseq.html](http://genes.mit.edu/burgelab/maxent/Xmaxentscan_scoreseq.html)

## Reference

1. Wappenschmidt, B. *et al.* Analysis of 30 putative BRCA1 splicing mutations in hereditary breast and ovarian cancer families identifies exonic splice site mutations that escape in silico prediction. *PLoS One* 7, e50800 (2012).

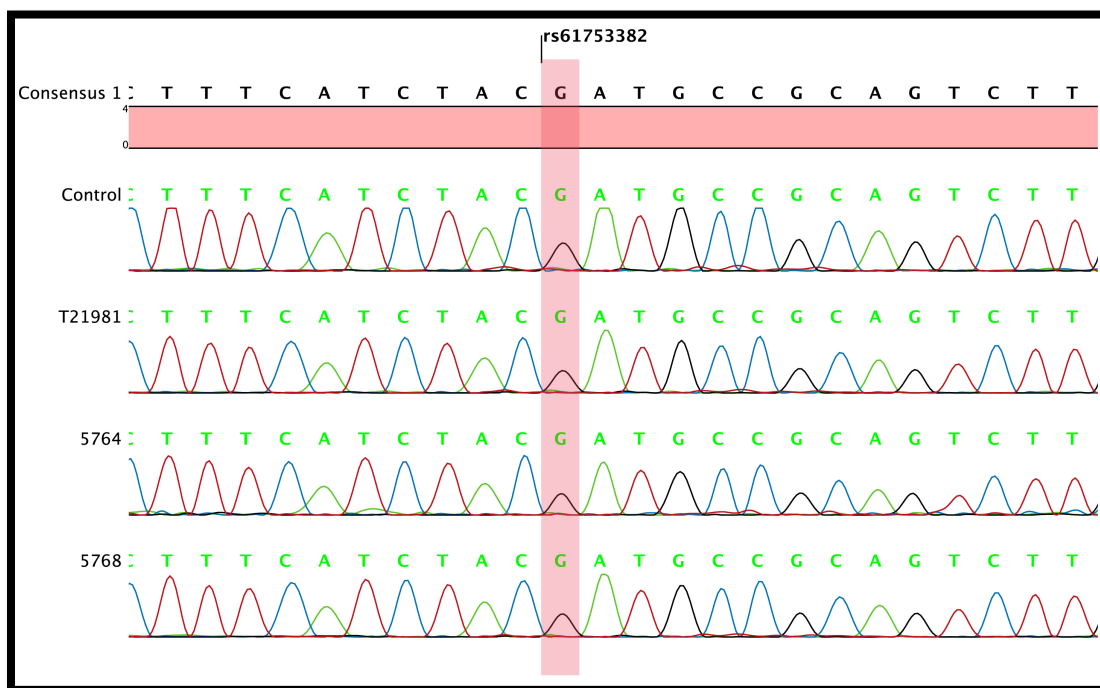

**Supplementary Figure 2:** RNA transcript analysis of a rare exonic SNV in three probands carrying the c.1005-1C>T mutation. By haplotype analysis we show that the minor allele (A) of the rs61753382 SNV (reference G) is linked to the c.1005-1C>T change in affected individuals from families A and C. By Sanger sequencing of cDNA transcripts from affected individuals (T21981, 5764, 5768) we show the presence of only the wild-type transcript (G allele), indicated in red, in all affected individuals. Given the absence of the 'A' rs61753382 allele in RNA of affected individuals, we conclude that nonsense mediated decay of the mutant transcript (c.1005-1C>T) occurs due to exon four skipping and a frameshift mutation, Phe139Ilefs\*15 (predicted).

**Supplementary Table 2** Electro-clinical phenotypes of family members with *GRIN2A* mutations

| Ped Ref  | Age studied (yrs), Gender | Seizure onset (yrs) | Seizure offset (yrs) | Seizure type(s)      | Early Development | Regression | Intellect   | EEG                                                                                                                                                | MRI    | Speech / Language Difficulties | Syndrome | Pub Ref |
|----------|---------------------------|---------------------|----------------------|----------------------|-------------------|------------|-------------|----------------------------------------------------------------------------------------------------------------------------------------------------|--------|--------------------------------|----------|---------|
| A:I:1    | 71, M                     | NA                  | NA                   | NA                   | Normal            | No         | Normal      | Normal                                                                                                                                             | ND     | Yes                            | ADRES    | 1       |
| A:II:2   | 45, F                     | 6                   | 13                   | Rolandic TCS         | Normal            | No         | Normal      | Normal                                                                                                                                             | ND     | Yes                            | ADRES    | 1       |
| A:II:4   | 39, M                     | 6                   | 13                   | Rolandic TCS         | Normal            | No         | Normal      | Normal                                                                                                                                             | Normal | Yes                            | ADRES    | 1       |
| A:II:5   | 39, M                     | 6                   | 13                   | Rolandic TCS         | Speech delay      | No         | Normal      | Normal                                                                                                                                             | Normal | Yes                            | ADRES    | 1       |
| A:III:2  | 8, M                      | 1.5                 | Ongoing              | Rolandic TCS         | Speech delay      | No         | Normal      | Bilateral independent CTS                                                                                                                          | ND     | Yes                            | ADRES    | 1       |
| A:III:3* | 11, F                     | 10                  | Ongoing              | Rolandic TCS         | Mild global DD    | No         | Mild ID     | Right CTS activated by sleep                                                                                                                       | Normal | Yes                            | ADRES    | 1       |
| A:III:5  | 6, M                      | 2.5                 | Ongoing              | Rolandic TCS<br>NCSE | Mild global DD    | Yes        | Borderline  | Bilateral independent CTS<br>NCSE - continuous CTS discharges awake & sleep                                                                        | Normal | Yes                            | ADRES    | 1       |
| B:II:3   | 33, M                     | Childhood           | NK                   | NK                   | NK                | NK         | Normal      | NK                                                                                                                                                 | NK     | Yes                            | Unclass. | NA      |
| B:III:2  | 7, F                      | 3.5                 | Ongoing              | Rolandic TCS<br>NCSE | Normal            | Yes        | Mild ID     | Continuous left CTS, multifocal, bi-fronto-central, right occipital discharges                                                                     | Normal | Yes                            | LKS      | NA      |
| B:III:3  | 6, F                      | 2                   | 2.5                  | DA                   | Normal            | Yes        | Mild ID     | Very frequent bilateral independent CTS continuous in sleep                                                                                        | Normal | Yes                            | LKS      | NA      |
| C:II:2   | 49, M                     | 5.5                 | 14                   | FDS<br>TCS           | Normal            | Yes        | Mild ID     | Frequent generalized and multi-focal discharges                                                                                                    | ND     | Yes                            | ECSWS    | NA      |
| C:III:1  | 19, M                     | 2                   | 16                   | Rolandic             | Mild global DD    | Yes        | Moderate ID | Very frequent bilaterally synchronous mid and posterior temporal and parietal discharges                                                           | Normal | Yes                            | ECSWS    | NA      |
| D:II:2   | 42, F                     | NA                  | NA                   | NA                   | Normal            | No         | Normal      | ND                                                                                                                                                 | ND     | Yes                            | NA       | 2       |
| D:III:1  | 12, M                     | 7                   | 11                   | FDS                  | Mild global DD    | Yes        | Mild ID     | Intermittent discharges in clusters from left posterior hemisphere. High voltage bilateral discharges (awake recording only)                       | Normal | Yes                            | IEAD     | 2       |
| D:III:2  | 11, M                     | 11                  | 11                   | TCS                  | Normal            | No         | Borderline  | Bilateral CTS during drowsiness & sleep                                                                                                            | ND     | Yes                            | IEAD     | 2       |
| D:III:6  | 9, F                      | 6.5                 | Ongoing              | FDS<br>TCS           | Mild global DD    | Yes        | Mild ID     | Multifocal discharges from mid parietal and independent bilateral bioccipital regions. Very frequent in awake state and continuous in sleep (CSWS) | Normal | Yes                            | ECSWS    | 2       |

ADRES = Autosomal Dominant Rolandic Epilepsy and Speech Dyspraxia, CSWS = Continuous Spike-Wave in slow wave Sleep, CTS = centro-temporal spikes, DA = drop attack, DD = developmental delay, ECSWS = Epileptic Encephalopathy with Continuous Spike-Wave in slow wave Sleep, FDS = focal dyscognitive seizure, ID = intellectual disability, IEAD = Intermediate Epilepsy-Aphasia Disorder, LKS = Landau-Kleffner Syndrome, NA = not applicable, NCSE = non-convulsive status epilepticus, ND = not done, NK = not known, Ped Ref = pedigree reference, TCS = tonic-clonic seizure, Unclass = Unclassified, \* = mosaic Turner syndrome; Pub Ref = publication reference 1) Tsai, M. *et al.* Clinical genetic study of the epilepsy-aphasia spectrum. *Epilepsia* Accepted 30 October (2012) (2) Scheffer, I. E. *et al.* Autosomal dominant rolandic epilepsy and speech dyspraxia: a new syndrome with anticipation. *Ann. Neurol.* **38**, 633-642 (1995).

**Supplementary Table 3** PCR primer pairs for cDNA amplification of rs6173382

| Primer pair name  | Sequence (5' - 3')   |
|-------------------|----------------------|
| rs6173382_ext_Fwd | GGACAGTGCCTAATGGAAGC |
| rs6173382_ext_Rev | GCTGATGGAGAAGAGCAACC |
| rs6173382_int_Fwd | AGCACGGAGAGAAACATTCG |
| rs6173382_int_Rev | ACCCACAAACTGAAGCAAGG |

**Supplementary Note** Human subject recruitment and diagnosis

This study was approved by the Human Research Ethics Committees of Austin Health and the University of Washington. Proband with epileptic encephalopathies were recruited from the epilepsy clinic at Austin Health, the practices of the investigators and by referral for epilepsy genetics research from around Australia and internationally after informed consent. The cohort consisted of 519 patients with a diverse range of epileptic encephalopathy phenotypes. An epileptic encephalopathy was defined as refractory seizures and cognitive slowing or regression associated with frequent, ongoing epileptiform activity <sup>1</sup>. Detailed epilepsy and medical histories were obtained together with the results of investigations including EEG and MRI studies. Epilepsy syndromes were classified according to the Organization of the International League Against Epilepsy Commission on Classification <sup>1</sup>.

1. Berg, A. T. *et al.* Revised terminology and concepts for organization of seizures and epilepsies: report of the ILAE Commission on Classification and Terminology, 2005-2009. *Epilepsia* **51**, 676-85 (2010).
